# Supplementary material for: An Empirical Assessment and Comparison of Species-Based and Habitat-Based Surrogates: A Case Study of Forest Vertebrates and Large Old Trees
Source: PLoS One. 2014 Feb 24;9(2):e89807. doi: 10.1371/journal.pone.0089807 (PMC3933686; doi:10.1371/journal.pone.0089807)
Supplement: Table S2 — Estimates of the regression coefficient for species richness. (DOC) [file pone.0089807.s002.doc]

**Table S2: Estimates of the regression coefficient for species richness**

Estimates of the regression coefficient for the effect of the habitat-based and of the species-based surrogates fitted jointly or separately in negative binomial models for species richness.

|  |  | Habitat-based surrogate | | Species-based surrogate | |
| --- | --- | --- | --- | --- | --- |
| Model | Dataset | Estimate | S.e. | Estimate | S.e. |
| Joint | 1 | 0.48a | 0.10 | 0.06 | 0.08 |
| 2 | 0.80a | 0.16 | 0.06 | 0.18 |
| 3 | 0.44a | 0.12 | 0.07 | 0.11 |
| 4 | 0.60a | 0.18 | –0.05 | 0.16 |
| Separate | 1 | 0.51a | 0.10 | 0.19a | 0.07 |
| 2 | 0.81a | 0.15 | 0.44a | 0.18 |
| 3 | 0.44a | 0.11 | 0.11 | 0.11 |
| 4 | 0.58a | 0.17 | 0.10 | 0.15 |

a Significantly different from 0 at the 5% level.
